# Supplementary material for: Motor Skills Enhance Procedural Memory Formation and Protect against Age-Related Decline
Source: PLoS One. 2016 Jun 22;11(6):e0157770. doi: 10.1371/journal.pone.0157770 (PMC4917083; doi:10.1371/journal.pone.0157770)
Supplement: S3 File — The raw data from the second Control experiment. (XLSX) [file pone.0157770.s005.xlsx]

## Sheet: Sheet1
ID	Mean day1	Mean day 2	Difference	hours piano	IQ	Age
C1	7	9	2	n/a	78	25
C2	16.3333	19.6667	3.33333	n/a	80	23
C3	17	21.3333	4.33333	n/a	86	19
C4	12	14.6667	2.66667	n/a	86	26
C5	14	16.6667	2.66667	n/a	88	26
C6	14.3333	16.6667	2.33333	n/a	90	25
C7	5	7.66667	2.66667	n/a	92	27
C8	8.66667	15	6.33333	n/a	92	27
C9	18.6667	23.3333	4.66667	n/a	99	21
C10	14	18	4	n/a	103	23
C11	13	19.3333	6.33333	n/a	103	25
C12	13.6667	17.3333	3.66667	n/a	106	23
C13	12	18.6667	6.66667	n/a	106	25
C14	9	12.6667	3.66667	n/a	106	27
C15	7	14.3333	7.33333	n/a	109	25
C16	11.3333	13.6667	2.33333	n/a	117	24
C17	16	17.3333	1.33333	n/a	127	25
C18	7.66667	8.33333	0.666667	n/a	88	21
C19	14.3333	17	2.66667	n/a	97	20
C20	13	18.3333	5.33333	n/a	97	22
C21	16.3333	22.3333	6	n/a	99	23
C22	12	13.6667	1.66667	n/a	103	20
C23	16.3333	18.3333	2	n/a	103	23
C24	15	16.6667	1.66667	n/a	103	25
C25	15.3333	18.3333	3	n/a	106	25
C26	14.6667	18.6667	4	n/a	106	20
C27	16.3333	22	5.66667	n/a	109	22
C28	12	15	3	n/a	112	22
C29	18.3333	19.3333	1	n/a	115	24
C30	4.66667	7.66667	3	n/a	115	21
C31	19.6667	28	8.33333	n/a	115	28
C32	12	20.3333	8.33333	n/a	115	23
C33	21.6667	25	3.33333	n/a	120	22
C34	8	10	2	n/a	120	25
C35	17	27.3333	10.3333	n/a	130	23
C36	11	14.3333	3.33333	n/a	130	28
C37	10	16.3333	6.33333	n/a	142	23
P1	16	19	3	760	92	23
P2	20.6667	25.6667	5	500	101	24
P3	21	21	0	4500	106	32
P4	12	14	2	1000	106	21
P5	19	21	2	1000	109	22
P6	19.6667	20.6667	1	4000	109	23
P7	17	22.3333	5.33333	1500	115	27
P8	27.3333	28.3333	1	5000	117	28
P9	22.6667	24.3333	1.66667	3750	117	24
P10	23.3333	26.6667	3.33333	5000	127	23
P11	25	26.6667	1.66667	5000	130	21
P12	28.6667	29.6667	1	741	130	18
P13	15.6667	18.3333	2.66667	4873	80	18
P14	23.6667	28.6667	5	10000	82	21
P15	9.33333	11	1.66667	1000	95	21
P16	34.3333	34.6667	0.333333	2500	97	21
P17	18.3333	18.3333	0	1300	101	22
P18	28	33	5	3000	106	21
P19	12.6667	24.3333	11.6667	3500	112	23
P20	24	26.6667	2.66667	500	115	25
P21	23	29.6667	6.66667	1400	115	23
P22	12.6667	18.6667	6	530	117	25
P23	25.3333	31.3333	6	10000	117	24
P24	25.3333	28.3333	3	3000	120	27
P25	31.6667	31.3333	-0.333333	2500	123	25
P26	21	24	3	1500	127	25
P27	27.6667	35.3333	7.66667	2500	127	23
P28	27	33.3333	6.33333	10000	127	19
P29	21.6667	23.3333	1.66667	2000	130	20
P30	22.3333	31	8.66667	8000	142	20
